# Supplementary material for: Triazolo[4,5-d]pyrimidines as Validated General Control Nonderepressible 2 (GCN2) Protein Kinase Inhibitors Reduce Growth of Leukemia Cells
Source: PubMed Central journal article supplement (PMC6197744; doi:10.1016/j.csbj.2018.09.003), 2018-09-28
Supplement: mmc2.pdf [file mmc2.pdf]

| Kinase          | Family | % Activity Remaining |
|-----------------|--------|----------------------|
|                 |        | Compound 2 (0.5 uM)  |
| AAK1            | Other  | 73.5                 |
| ABL1            | TK     | 88.9                 |
| ACVR2A/ACVR2    | TKL    | 100.0                |
| AKT1            | AGC    | 98.4                 |
| AKT2            | AGC    | 96.8                 |
| AKT3            | AGC    | 100.0                |
| AMPK-a1/AMPK    | CAMK   | 100.0                |
| AURKA           | Other  | 97.1                 |
| AURKB           | Other  | 94.7                 |
| AURKC           | Other  | 98.7                 |
| CAMK1D          | CAMK   | 92.9                 |
| CAMK2D          | CAMK   | 89.9                 |
| CDK5            | CMGC   | 94.4                 |
| CLK2            | CMGC   | 93.0                 |
| DAPK3           | CAMK   | 97.6                 |
| DDR1            | TK     | 93.1                 |
| EPHA5           | TK     | 97.8                 |
| EPHB2           | TK     | 97.7                 |
| FLT1/VEGFR1     | TK     | 51.7                 |
| FLT3            | TK     | 100.0                |
| HCK             | TK     | 96.0                 |
| IGF1R           | TK     | 100.0                |
| ITK             | TK     | 89.9                 |
| KIT             | TK     | 88.8                 |
| MAP3K10/MLK2    | TKL    | 96.7                 |
| MAP3K11/MLK3    | TKL    | 100.0                |
| MAPK14 p38a     | CMGC   | 100.0                |
| MARK1           | CAMK   | 100.0                |
| MARK2           | CAMK   | 99.3                 |
| MSK2/RPS6KA4    | AGC    | 100.0                |
| MST2            | STE    | 100.0                |
| MUSK            | TK     | 100.0                |
| PDGFRB          | TK     | 84.4                 |
| PDK1/PDPK1      | AGC    | 96.2                 |
| PIM1            | CAMK   | 93.4                 |
| PKA/PRKACA      | AGC    | 100.0                |
| PKCe/PRKCE      | AGC    | 100.0                |
| PKG1/PRKG1      | AGC    | 96.0                 |
| PKX/PRKX        | AGC    | 97.7                 |
| PLK4            | Other  | 100.0                |
| PTK2B/PYK2      | TK     | 96.0                 |
| RSK2/RPS6KA3    | AGC    | 89.9                 |
| SLK             | STE    | 98.7                 |
| SIK1/SNF1LK     | CAMK   | 99.9                 |
| SIK2            | CAMK   | 100.0                |
| SRC             | TK     | 99.1                 |
| TNK1            | TK     | 100.0                |
| VEGFR2/KDR/FLK1 | TK     | 77.1                 |
| YANK2           | AGC    | 100.0                |
| YSK1            | STE    | 93.6                 |

Supplementary Material S2. Compound 2 broad kinase panel screen.
