# Supplementary material for: Triazolo[4,5-d]pyrimidines as Validated General Control Nonderepressible 2 (GCN2) Protein Kinase Inhibitors Reduce Growth of Leukemia Cells
Source: PubMed Central journal article supplement (PMC6197744; doi:10.1016/j.csbj.2018.09.003), 2018-09-28
Supplement: mmc3.pdf [file mmc3.pdf]

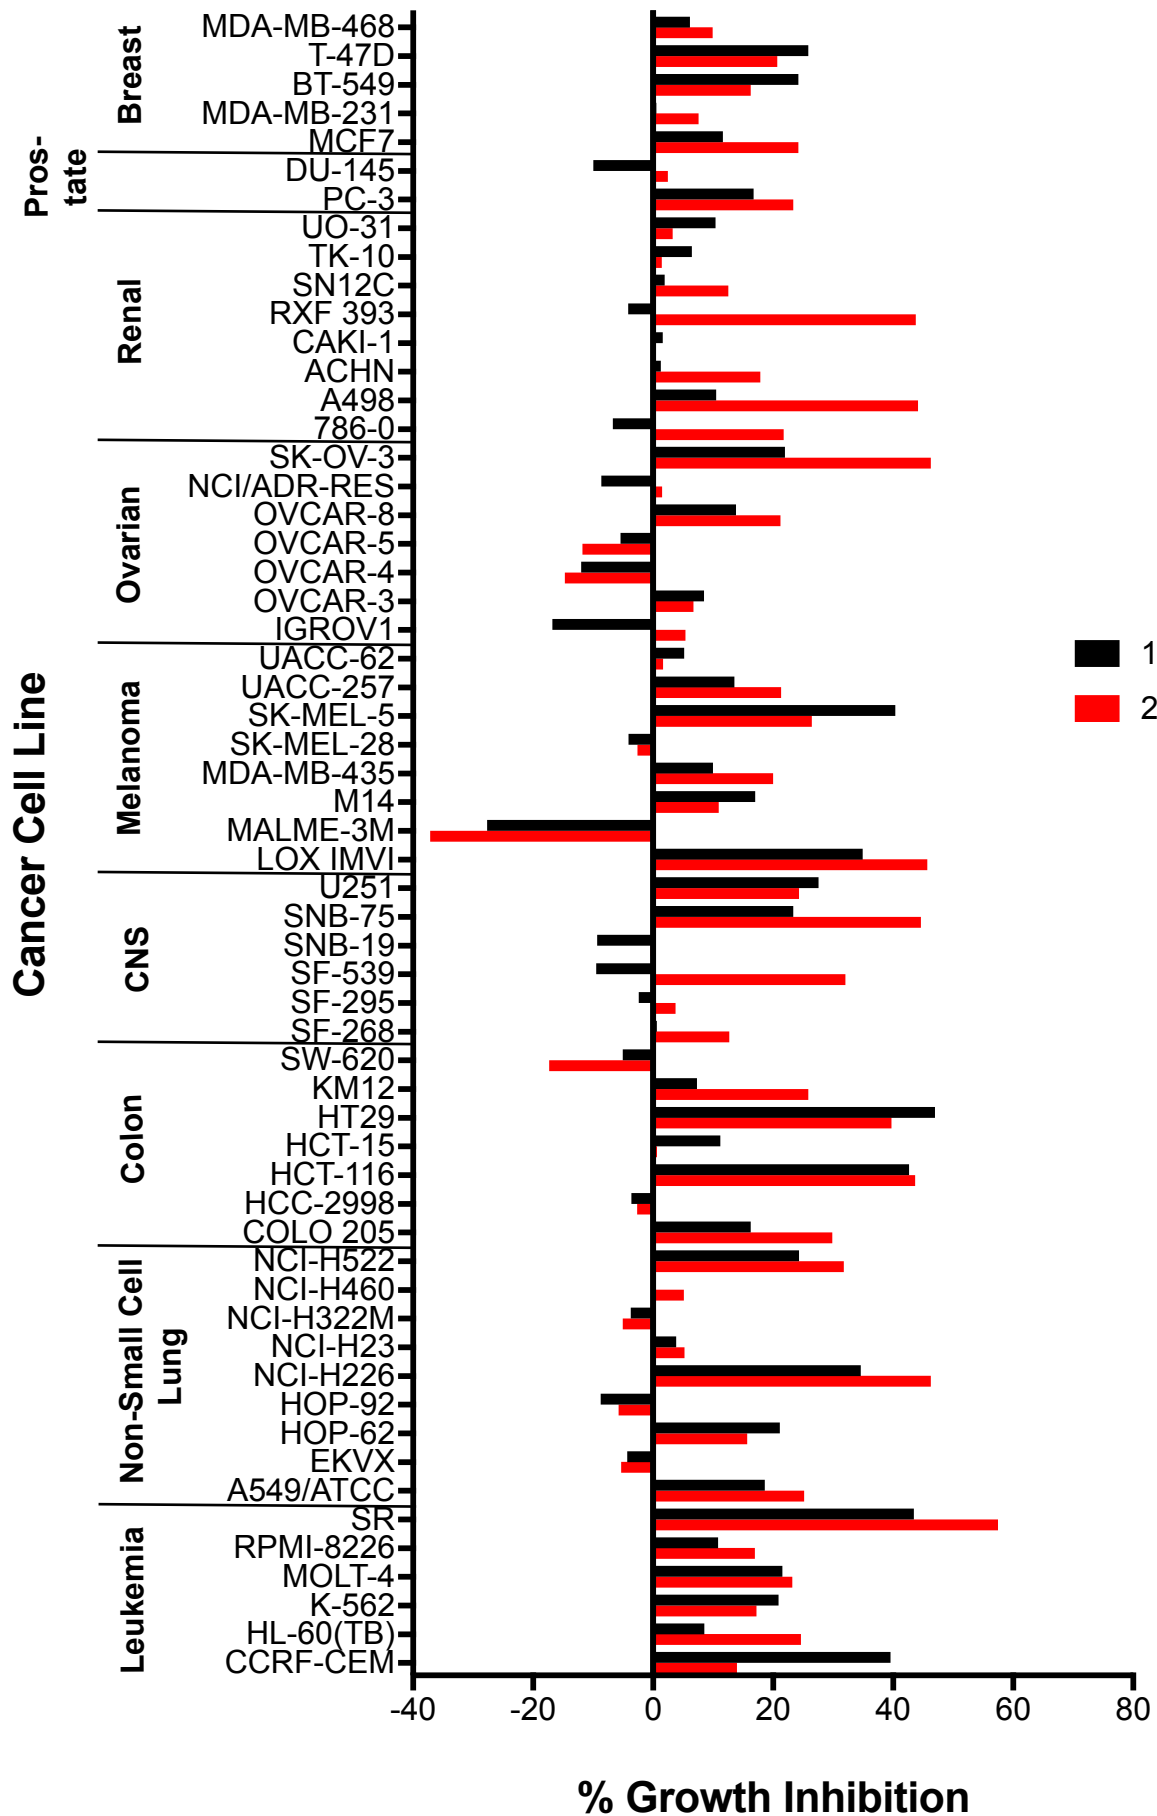

Supplementary Material S3. Percent growth inhibition by cancer type of 1 and 2 from the NCI-60 one-dose screen.
